# Supplementary material for: Spectroscopy and SEM imaging reveal endosymbiont-dependent components changes in germinating kernel through direct and indirect coleorhiza-fungus interactions under stress
Source: PubMed Central journal article supplement (PMC6367502; doi:10.1038/s41598-018-36621-8), 2019-02-07
Supplement: 41598_2018_36621_MOESM1_ESM.pdf [file 41598_2018_36621_MOESM1_ESM.pdf]

## Supplementary Information

### Article in Scientific Reports

#### Spectroscopy and SEM imaging reveal endosymbiont-dependent components changes in germinating kernel through direct and indirect coleorhiza-fungus interactions under stress

Vladimir Vujanovic, Seon Hwa Kim, Rachid Lahlali, Chithra Karunakaran

#### Supplementary figures S1

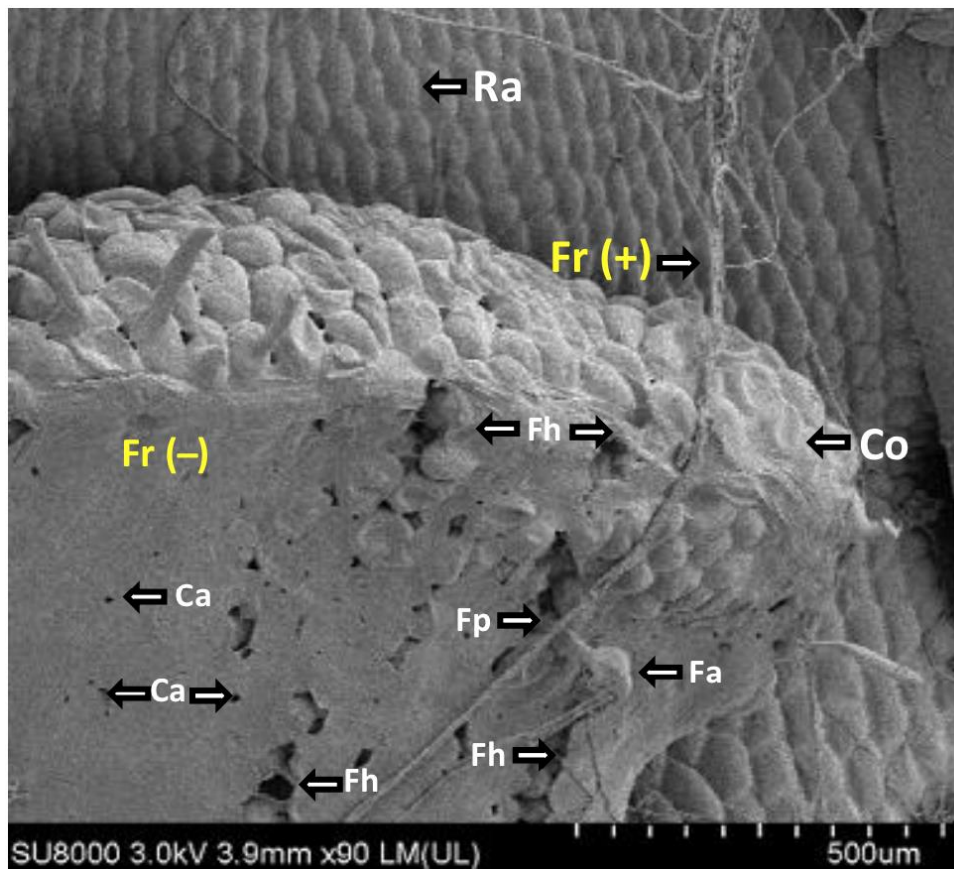

**Supplementary Figure 1.** Comparison between SMCD 2206 colonized (Fr +) vs. non-colonized (Fr -) coleorhiza zones. Ra: radicle (plant embryonic root), Co: coleorhiza, Ca: coleorhiza aerial small (Fr +) openings, Fr: fungal *rhizomorph* or "root-form" hyphal aggregation, Fa: fungal appressorium or special hyphal pressing organ, Fp: fungal penetration hypha specific for infection, Fh: fungal colonization hyphae within large openings associated with direct *Penicillium*-polymer (Fr +) contact zone.

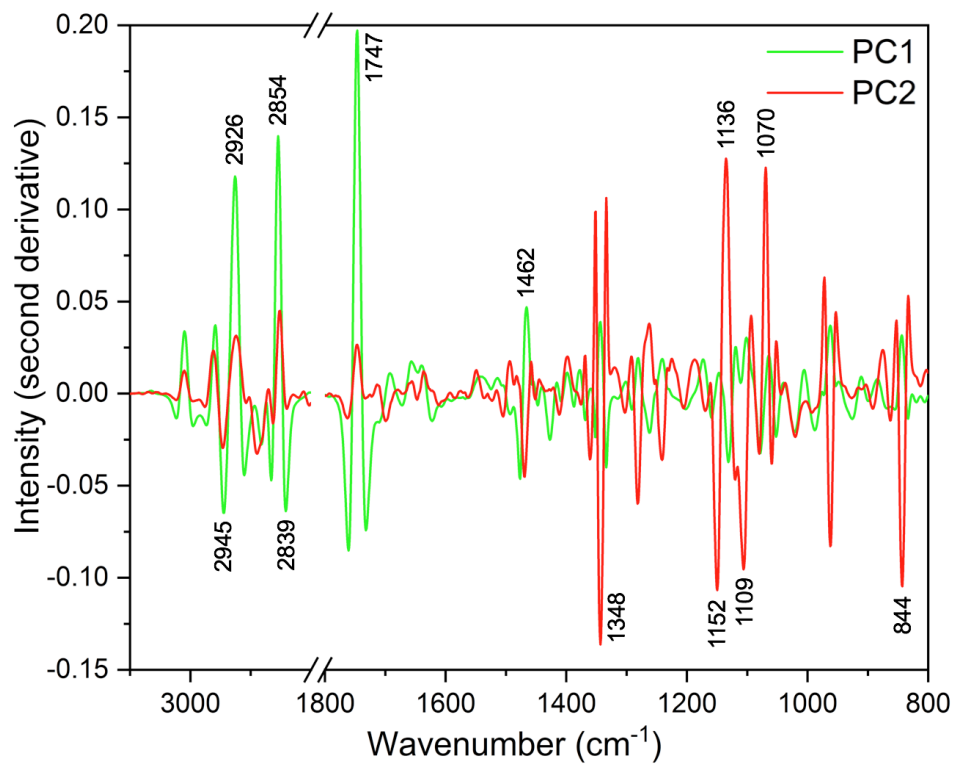

**Supplementary Figure 2.** PCA analysis – loadings plot.
